# Supplementary material for: Controlling the shape and size of BiOBr sheets by varying the bromine source and reactant concentration
Source: Royal Society of Chemistry journal article supplement (doi:10.1039/d1nj00057h), 2021-01-01
Supplement: d1nj00057h1.pdf [file d1nj00057h1.pdf]

# Supplementary Materials for

## Controlling the shape and size of BiOBr sheets by varying the bromine source and reactant concentration

Guodong Shen,<sup>a,b</sup> Yongping Pu,<sup>\*b</sup> Yongfei Cui,<sup>b</sup> Panpan Jing,<sup>b</sup> and Runjun Sun,<sup>\*a,c</sup>

<sup>a</sup> School of Textile Science and Engineering, Xi'an Polytechnic University, Xi'an, 710048, China.

<sup>b</sup> School of Materials Science and Engineering, Shaanxi University of Science & Technology, Xi'an, 710021, China.

<sup>c</sup> State Key Laboratory of Intelligent Textile Material and Products, Xi'an Polytechnic University, Xi'an, 710048, China

### **This PDF file includes:**

Fig. S1 to Fig. S3

### **List of Figures**

Fig. S1 XRD patterns of BiOBr sheets prepared by different raw materials.

Fig. S2 XRD patterns of BiOBr sheets prepared at different reactant concentrations.

Fig. S3 Photocatalytic performance comparison of BiOBr sheets with different shape to dye solution.

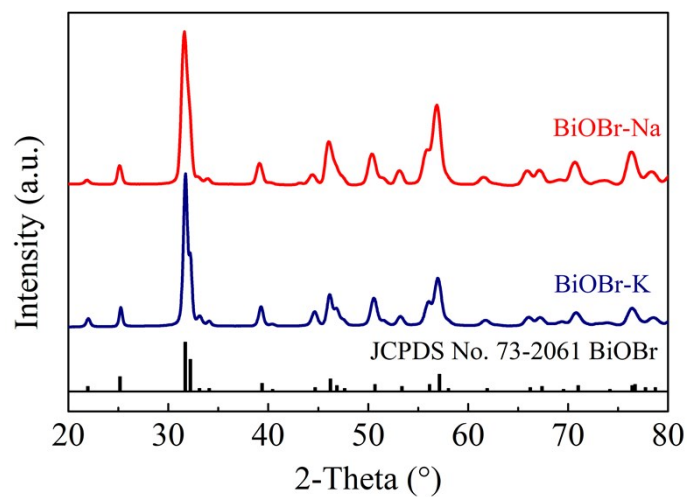

Fig. S1 XRD patterns of BiOBr sheets synthesized by different raw materials.

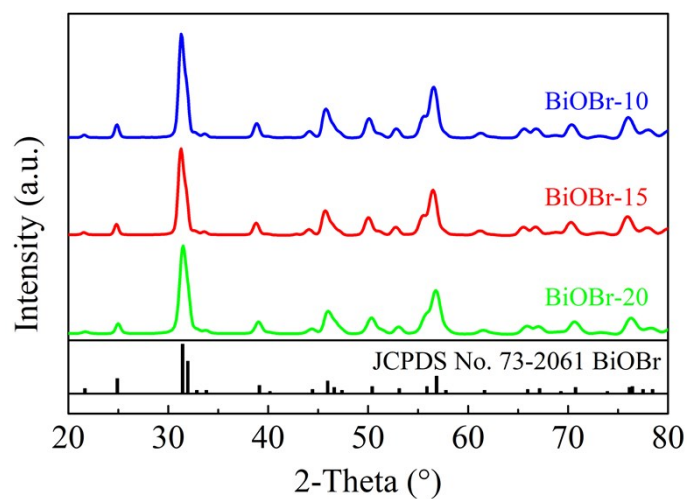

Fig. S2 XRD patterns of BiOBr sheets synthesized at different reactant concentrations.

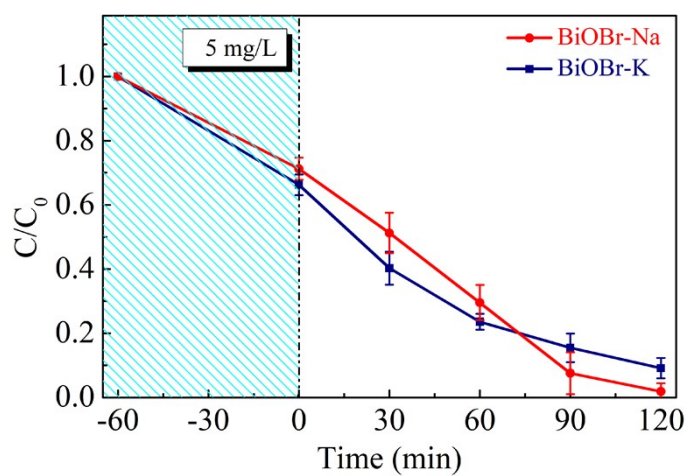

Fig. S3 Photocatalytic performance comparison of BiOBr sheets with different shape to dye solution.
